# Supplementary material for: Female Genital Mutilation: Knowledge and Skills of Health Professionals
Source: MDPI journal article supplement (doi:10.3390/healthcare9080974), 2021-07-31
Supplement: s1 [file s1]

| Age                                 |        |      |       |      |       |      |       |
|-------------------------------------|--------|------|-------|------|-------|------|-------|
|                                     | 20-40  |      | 41-50 |      | >50   |      | p     |
|                                     | (N335) |      | (384) |      | (448) |      |       |
|                                     | N      | %    | N     | %    | N     | %    |       |
| <b>Have received training</b>       | 43     | 12.8 | 59    | 15.4 | 61    | 13.6 |       |
| <b>Correct identification</b>       |        |      |       |      |       |      |       |
| Type of FGM                         | 30     | 8.9  | 47    | 12.2 | 48    | 10.7 |       |
| Countries                           | 77     | 23.0 | 78    | 20.3 | 85    | 19.0 |       |
| Legislation in Spain                | 101    | 30.1 | 126   | 32.8 | 169   | 37.7 |       |
| <b>Believe performed for</b>        |        |      |       |      |       |      |       |
| Tradition                           | 289    | 86.3 | 356   | 92.7 | 403   | 90.0 | 0.017 |
| Religion                            | 200    | 59.7 | 209   | 54.4 | 212   | 47.3 | 0.002 |
| Hygiene                             | 6      | 1.8  | 4     | 1.0  | 8     | 1.8  |       |
| Esthetic                            | 6      | 1.8  | 6     | 1.6  | 4     | 0.9  |       |
| Better opportunities to get married | 33     | 9.9  | 48    | 12.5 | 39    | 8.7  |       |

|                                                          |     |      |     |      |     |      |       |
|----------------------------------------------------------|-----|------|-----|------|-----|------|-------|
| Don't know                                               | 9   | 2.7  | 7   | 1.8  | 10  | 2.2  |       |
| <b>Proposals for prevention</b>                          |     |      |     |      |     |      |       |
| Periodic checkup                                         | 150 | 44.8 | 147 | 38.3 | 149 | 33.3 | 0.005 |
| Prevent travel to risk countries                         | 20  | 6.0  | 33  | 8.6  | 56  | 12.5 | 0.007 |
| Sensitize parents                                        | 275 | 82.0 | 326 | 84.9 | 369 | 82.4 |       |
| Exemplary judicial sentences                             | 104 | 31.0 | 92  | 24.0 | 94  | 21.0 | 0.005 |
| Report to authorities                                    | 275 | 82.1 | 306 | 79.7 | 333 | 74.3 |       |
| Train primary care professionals to carry out prevention | 107 | 31.9 | 116 | 30.2 | 127 | 28.3 | 0.024 |
| <b>Have detected some case</b>                           |     |      |     |      |     |      |       |
| <b>Attitude</b>                                          |     |      |     |      |     |      |       |
| Discuss in the outpatient clinic                         | 7   | 2.1  | 6   | 1.6  | 7   | 1.6  |       |
| Asked about other daughters                              | 3   | 0.9  | 6   | 1.6  | 6   | 1.3  |       |



| Profession             |         |      |        |      |         |      |        |      |       |     |        |      |        |
|------------------------|---------|------|--------|------|---------|------|--------|------|-------|-----|--------|------|--------|
|                        | N       |      | G      |      | Fm      |      | Mw     |      | O     |     | P      |      | P      |
|                        | (N 687) |      | (N 12) |      | (N 346) |      | (N 43) |      | (N 2) |     | (N 78) |      |        |
|                        | N       | %    | N      | %    | N       | %    | N      | %    | N     | %   | N      | %    |        |
| Have received training | 79      | 11.5 | 2      | 16.7 | 46      | 13.3 | 19     | 44.2 | 1     | 50  | 16     | 20.5 | <0.001 |
| Correct identification |         |      |        |      |         |      |        |      |       |     |        |      |        |
| Type of FGM            | 61      | 8.9  | 5      | 41.7 | 32      | 9.3  | 16     | 37.2 | 0     | 0   | 11     | 14.1 | <0.001 |
| Countries              | 138     | 20.1 | 1      | 8.3  | 59      | 17.1 | 16     | 37.2 | 0     | 0   | 26     | 33.3 | 0.002  |
| Legislation in Spain   | 191     | 27.8 | 8      | 66.7 | 119     | 34.4 | 28     | 65.1 | 1     | 50  | 49     | 62.8 | <0.001 |
| Believe performed for  |         |      |        |      |         |      |        |      |       |     |        |      |        |
| Tradition              | 611     | 88.9 | 12     | 100  | 346     | 100  | 43     | 100  | 2     | 100 | 78     | 100  |        |
| Religion               | 360     | 52.4 | 7      | 58.3 | 182     | 52.6 | 24     | 55.8 | 1     | 50  | 47     | 60.3 |        |
| Hygiene                | 4       | 0.6  | 0      | 0    | 4       | 1.16 | 4      | 9.3  | 0     | 0   | 6      | 7.7  | <0.001 |



|                                                 |     |      |    |      |     |      |    |      |   |      |    |      |        |
|-------------------------------------------------|-----|------|----|------|-----|------|----|------|---|------|----|------|--------|
| <b>Have detected some case</b>                  | 16  | 2.3  | 3  | 25.0 | 15  | 4.3  | 23 | 53.5 | 1 | 50.0 | 5  | 6.4  | <0.001 |
| <b>Attitude</b>                                 |     |      |    |      |     |      |    |      |   |      |    |      |        |
| Discuss in the outpatient clinic                | 3   | 0.4  | 1  | 8.3  | 5   | 1.4  | 9  | 21.0 | 1 | 50   | 1  | 1.3  | <0.001 |
| Asked about other daughters                     | 4   | 0.6  | 1  | 8.3  | 1   | 0.3  | 7  | 16.3 | 1 | 50   | 1  | 1.3  | <0.001 |
| Asked other professionals                       | 3   | 0.4  | 0  | 0    | 1   | 0.3  | 11 | 25.6 | 1 | 50   | 1  | 1.3  | <0.001 |
| Report to authorities                           | 0   | 0    | 0  | 0    | 0   | 0    | 0  | 0    | 0 | 0    | 0  | 0    |        |
| Ignore                                          | 5   | 0.7  | 2  | 16.7 | 6   | 1.7  | 7  | 16.3 | 0 | 0    | 0  | 0    | <0.001 |
| <b>Know some protocol of action</b>             | 42  | 6.1  | 1  | 8.3  | 25  | 7.2  | 8  | 18.6 | 1 | 50   | 24 | 30.8 | <0.001 |
| <b>Proposals to improve care and prevention</b> |     |      |    |      |     |      |    |      |   |      |    |      |        |
| Education                                       | 639 | 93.0 | 10 | 83.3 | 309 | 89.3 | 40 | 93.0 | 2 | 100  | 67 | 85.9 |        |
| Material for professionals                      | 282 | 41.0 | 5  | 41.7 | 148 | 42.8 | 24 | 55.8 | 0 | 0    | 41 | 52.6 |        |

|                                             |     |      |   |      |     |      |    |      |   |     |    |      |       |
|---------------------------------------------|-----|------|---|------|-----|------|----|------|---|-----|----|------|-------|
| Material to discuss the issue with families | 409 | 59.5 | 7 | 58.5 | 188 | 54.3 | 33 | 76.7 | 0 | 0   | 49 | 62.8 | 0.034 |
| Intercultural mediation                     | 365 | 53.1 | 7 | 58.5 | 157 | 45.3 | 34 | 79.1 | 0 | 0   | 44 | 56.4 | 0.001 |
| More time to address it                     | 351 | 60.8 | 7 | 58.5 | 189 | 54.6 | 24 | 55.8 | 1 | 50  | 58 | 74.3 | 0.008 |
| Counseling                                  | 418 | 14.8 | 6 | 50   | 200 | 57.8 | 33 | 76.4 | 2 | 100 | 49 | 62.8 |       |
| Greater police intervention                 | 102 | 14.8 | 3 | 25   | 47  | 13.6 | 12 | 27.9 | 0 | 0   | 9  | 11.5 |       |

|                                     | Female | %    | Male | %    | p     |
|-------------------------------------|--------|------|------|------|-------|
| <b>Have received training</b>       | 118    | 14,1 | 45   | 13,6 |       |
| <b>Correct identification</b>       | 43     | 5,1  | 9    | 2,7  |       |
| Type of FGM                         | 97     | 11,6 | 28   | 8,5  |       |
| Countries                           | 179    | 21,4 | 61   | 18,5 |       |
| Legislation in Spain                | 286    | 34,1 | 110  | 33,3 |       |
| <b>Believe performed for</b>        |        |      |      |      |       |
| Tradition                           | 751    | 89,6 | 298  | 90,3 |       |
| Religion                            | 446    | 53,2 | 175  | 53,0 |       |
| Hygiene                             | 12     | 1,4  | 6    | 1,8  |       |
| Esthetic                            | 9      | 1,1  | 7    | 2,1  |       |
| Better opportunities to get married | 97     | 11,6 | 23   | 7,0  | 0,020 |

|                                                          |     |      |     |      |                 |
|----------------------------------------------------------|-----|------|-----|------|-----------------|
| Don't know                                               | 18  | 2,2  | 8   | 2,4  |                 |
| <b>Proposals for prevention</b>                          |     |      |     |      |                 |
| Periodic checkup                                         | 330 | 39,4 | 116 | 35,2 |                 |
| Prevent travel to risk countries                         | 71  | 8,5  | 38  | 11,5 |                 |
| Sensitize parents                                        | 710 | 84,7 | 261 | 79,1 | <b>0,021</b>    |
| Exemplary judicial sentences                             | 211 | 25,2 | 79  | 23,9 |                 |
| Report to authorities                                    | 242 | 28,9 | 108 | 32,7 |                 |
| Train primary care professionals to carry out prevention | 679 | 81,0 | 236 | 71,5 | <b>&lt;0,01</b> |
| <b>Have detected some case</b>                           | 48  | 5,7  | 15  | 4,5  |                 |
| <b>Attitude</b>                                          |     |      |     |      |                 |
| Discuss in the outpatient clinic                         | 16  | 1,9  | 4   | 1,21 |                 |
| Asked about other daughters                              | 12  | 1,4  | 3   | 0,90 |                 |
| Asked other professionals                                | 12  | 1,4  | 5   | 1,5  |                 |
| Report to authorities                                    | 0   | 0    | 0   | 0    |                 |
| Ignore                                                   | 17  | 2,0  | 3   | 0,9  |                 |
| <b>Know some protocol of action</b>                      | 71  | 8,5  | 30  | 9,0  |                 |
| <b>Proposals to improve care and prevention</b>          |     |      |     |      |                 |
| Education                                                | 773 | 92,2 | 294 | 89,0 |                 |
| Material for professionals                               | 370 | 44,2 | 130 | 39,3 |                 |
| Material to discuss the issue with families              | 525 | 62,6 | 161 | 48,8 | <b>&lt;0,01</b> |
| Intercultural mediation                                  | 453 | 54,0 | 154 | 46,7 | <b>0.023</b>    |
| More time to address it                                  | 457 | 54.5 | 173 | 52.4 |                 |
| Counseling                                               | 529 | 63.1 | 179 | 54.2 | <b>0.005</b>    |
| Greater police intervention                              | 124 | 14.8 | 49  | 5.84 |                 |
