# Supplementary material for: Female Genital Mutilation: Knowledge and Skills of Health Professionals
Source: MDPI journal article supplement (doi:10.3390/healthcare9080974), 2021-07-31
Supplement: s1 [file s1]

| Characteristic        | knowledge           |                                       |                              | Attitudes                                            |                                              |                                         |                                     |                   |
|-----------------------|---------------------|---------------------------------------|------------------------------|------------------------------------------------------|----------------------------------------------|-----------------------------------------|-------------------------------------|-------------------|
|                       | Typology<br>OR (CI) | Countries of<br>prevalence<br>OR (CI) | Cases<br>detected<br>OR (CI) | Discuss in<br>the<br>outpatient<br>clinic<br>OR (CI) | Asked about<br>other<br>daughters<br>OR (CI) | Asked other<br>professionals<br>OR (CI) | Report to<br>authorities<br>OR (CI) | Ignore<br>OR (CI) |
| <b>Age</b>            |                     |                                       |                              |                                                      |                                              |                                         |                                     |                   |
| 20-40                 | 1                   | 1                                     | 1                            | 1                                                    | 1                                            | 1                                       | 1                                   | 1                 |
| 41-50                 | 1.5 (0.9-2.5)       | 0.8 (0.6-1.2)                         | 0.6 (0.3-1.3)                | 0.7 (0.2-2.4)                                        | 2.1 (0.5-9.2)                                | 0.9 (0.3-2.9)                           | 0                                   | 0.5 (0.2-1.8)     |
| >50                   | 1.4 (0.8-2.3)       | 0.8 (0.5-1.1)                         | 0.8 (0.4-1.5)                | 1.0 (0.3-3.3)                                        | 2.5 (0.5-11.6)                               | 0.3 (0.1-1.7)                           | 0                                   | 0.8 (0.3-2.4)     |
| <b>Profession</b>     |                     |                                       |                              |                                                      |                                              |                                         |                                     |                   |
| Nursing               | 1                   | 1                                     | 1                            | 1                                                    | 1                                            | 1                                       | 1                                   | 1                 |
| Gynaecologist         | 8.5 (2.5-29.1)*     | 0.36 (0.04-2.8)                       | 14.7 (3.5-61.6)              | 21.9 (2.0-244.1)*                                    | 14.9 (1.4-160.7)*                            | 0                                       | 0                                   | 39.5 (6.2-250.9)  |
| Family medicine       | 1.0 (0.7-1.7)       | 0.84 (0.6-1.2)                        | 2.0 (1.0-4.3)*               | 3.7 (0.8-16.0)                                       | 0.5 (0.5-4.3)                                | 0.6 (0.1-5.8)                           | 0                                   | 3.0 (0.9-113.7)   |
| Midwife               | 4.3(2.1-8.8)*       | 1.7 (0.9-3.4)                         | 48.5 (21.3-110.1)*           | 43.7 (10.7-178.4)*                                   | 28.9 (7.6-110.7)*                            | 83.2 (19.6-352.5)*                      | 0                                   | 32.0 (9.0-113.2)  |
| Obstetrician          | 0                   | 0                                     | 0                            | 0                                                    | 0                                            | 0                                       | 0                                   | 0                 |
| Paediatrician         | 1.5(0.7-3.0)        | 1.9 (1.4-3.2)*                        | 3.0 (1.0-8.5)                | 2.7 (0.3-26.8)                                       | 1.9 (0.2-17.4)                               | 3.2 (0.3-31.9)                          | 0                                   | 0                 |
| <b>Gender</b>         |                     |                                       |                              |                                                      |                                              |                                         |                                     |                   |
| Male                  | 1                   | 1                                     | 1                            | 1                                                    | 1                                            | 1                                       | 1                                   | 1                 |
| Female                | 0.7(0.4-1.1)        | 0.9 (0.6-1.3)                         | 0.8 (0.4-1.7)                | 0.6 (0.2-2.2)                                        | 0.8 (0.2-3.3)                                | 3.0 (0.8-11.4)                          | 0                                   | 0.4 (0.1-1.5)     |
| <b>Training</b>       |                     |                                       |                              |                                                      |                                              |                                         |                                     |                   |
| Training not received | 1                   | 1                                     | 1                            | 1                                                    | 1                                            | 1                                       | 1                                   | 1                 |
| Training received     | 3.0 (1.9-4.7)*      | 2.3 (1.6-3.4)*                        | 1.0 (0.5-2.1)                | 2.5 (0.9-7.0)                                        | 1.9 (0.6-6.3)                                | 1.2 (0.4-4.2)                           | 0                                   | 0.5 (0.1-1.9)     |

Results are expressed using Odds Ratio and CI 95%

\* p < 0.05 on comparison with the reference category
